# Supplementary material for: Functional hydroxyapatite bioceramics with excellent osteoconductivity and stern-interface induced antibacterial ability
Source: Royal Society of Chemistry journal article supplement (doi:10.1039/c6bm00009f), 2016-01-01
Supplement: c6bm00009f1.pdf [file c6bm00009f1.pdf]

## Supplementary Information

### **Functional Hydroxyapatite Bioceramics with Excellent Osteoconductivity and Stern-Interface Induced Antibacterial Ability**

Chao Shi <sup>a</sup>, Jianyong Gao<sup>b,1</sup>, Ming Wang <sup>a</sup>, Yiran Shao <sup>a</sup>, Liping Wang <sup>a</sup>, Dalin Wang <sup>b</sup>,

Yingchun Zhu <sup>a,2</sup>

<sup>a</sup>*Key Lab of Inorganic Coating Materials, Shanghai Institute of Ceramics, Chinese*

*Academy of Sciences, 1295 Dingxi Road, Shanghai 200050, China*

<sup>b</sup>*Department of Stomatology, Changhai Hospital, Second Military Medical University,*

*168 Changhai Road, Shanghai 200433, China*

---

<sup>1</sup> Corresponding author; E-mail: [yongjiangao1976@126.com](mailto:yongjiangao1976@126.com);

<sup>2</sup> Corresponding author; E-mail: [yzhu@mail.sic.ac.cn](mailto:yzhu@mail.sic.ac.cn); Tel/Fax: +86-21-5241-2632.

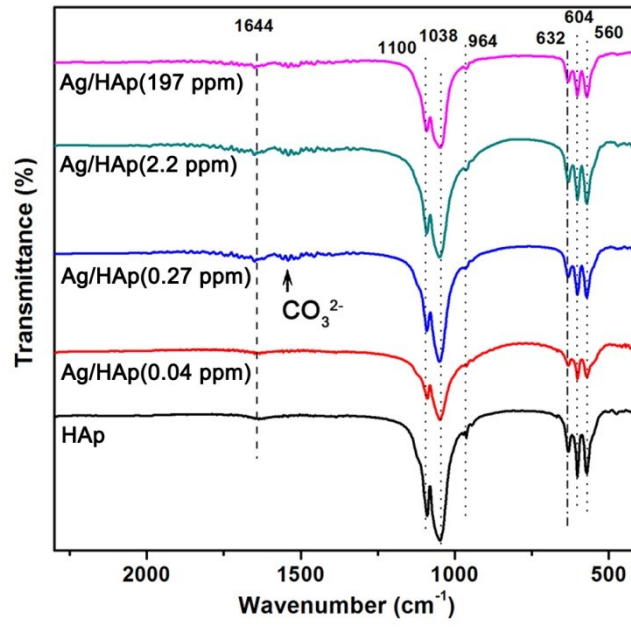

**Fig. S1** FTIR spectra of HAp and Ag/HAp bioceramics calcined at 1000 °C for 3 h

**Table S1.** The real density ( $\rho_r$ ) and theoretical density ( $\rho_t$ ) of HAp and Ag/HAp bioceramics calcined at 1000 °C for 3 h.

| samples          | Real density<br>( $\rho_r$ , g/cm <sup>3</sup> ) | Theoretical density<br>( $\rho_t$ , g/cm <sup>3</sup> ) | Relatively density<br>(%) |
|------------------|--------------------------------------------------|---------------------------------------------------------|---------------------------|
| HAp              | 3.0215                                           | 3.16                                                    | 95.62                     |
| Ag/HAp(0.04 ppm) | 3.0557                                           | 3.16                                                    | 96.70                     |
| Ag/HAp(0.27 ppm) | 3.0584                                           | 3.16                                                    | 96.78                     |
| Ag/HAp(2.2 ppm)  | 3.0847                                           | 3.16                                                    | 97.62                     |
| Ag/HAp(197 ppm)  | 3.1084                                           | 3.16                                                    | 98.37                     |

### **Methods of real density ( $\rho_r$ ) and theoretical density ( $\rho_t$ ) measurement**

The bulk density of the obtained HAp and Ag/HAp bioceramics was measured by the Archimedes method, using ethanol as the medium. The “dry weight” ( $M_D$ ), the “wet weight” ( $M_W$ ) (infiltrating ethanol into the open pores of the samples), and the “floating weight” ( $M_F$ ) of the samples in ethanol were measured, and the bulk density of the Ag/HAp bioceramics was calculated using the equation  $\rho_E * M_D / (M_W - M_F)$ , in which  $\rho_E$  represents the density of ethanol at the experimental temperature. To infiltrate ethanol into the open pores of the samples, the bioceramics were placed in a flask filled with ethanol and evacuated. The wet weight ( $M_W$ ) of the samples was measured after wiping the samples with wet cotton to remove the water absorbed on the surfaces of the samples.
